# Supplementary material for: Controllable Release of Povidone-Iodine from Networked Pectin@Carboxymethyl Pullulan Hydrogel
Source: MDPI journal article supplement (doi:10.3390/polym13183118), 2021-09-15
Supplement: s1 [file s1]

## Supplementary File

**Figure S1:** EDX for the prepared hydrogel; **[a]** CMP, **[b]** Pe@CMP (1:9), **[c]** Pe@CMP (2:8), **[d]** Pe@CMP (3:7) and **[e]** PI@Pe@CMP (3:7).

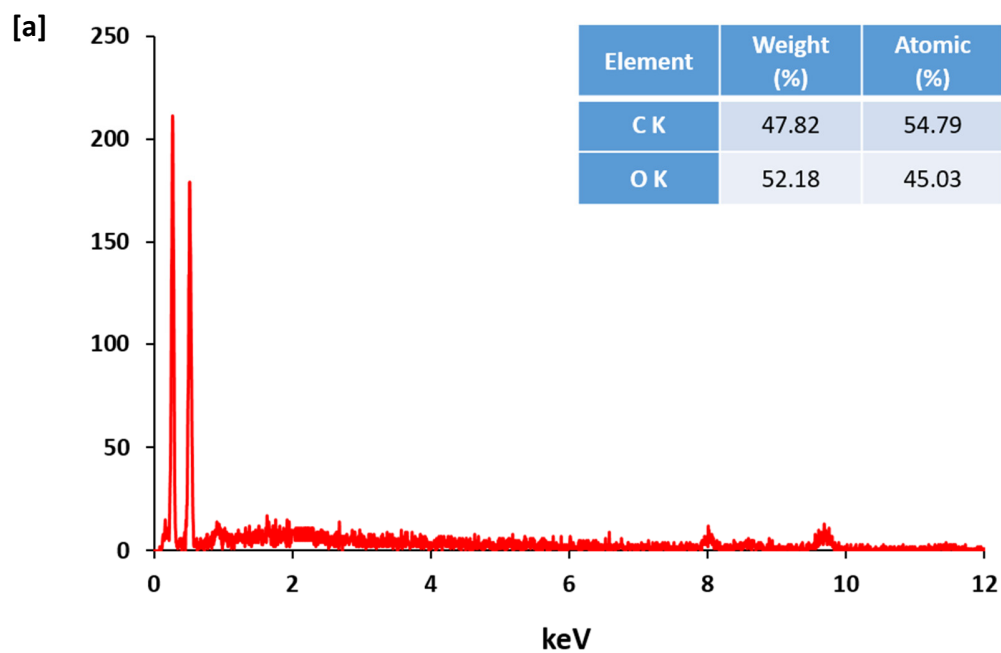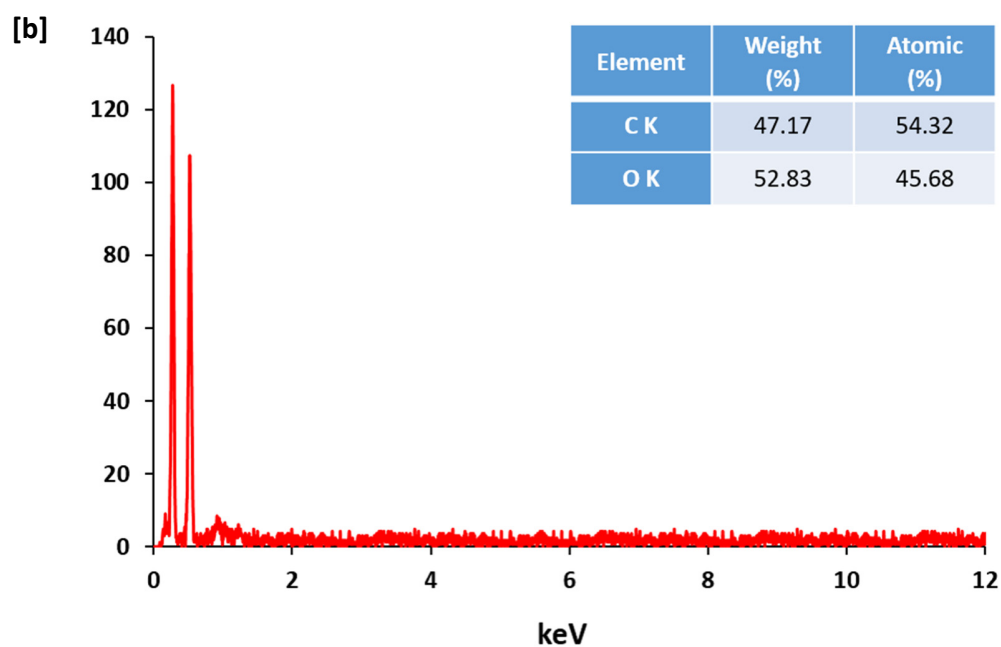

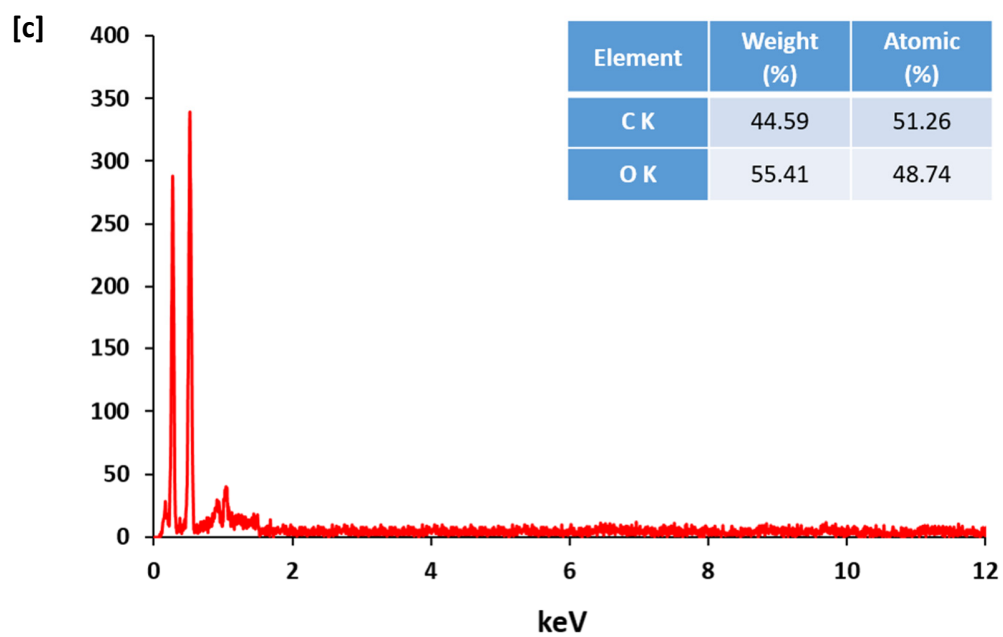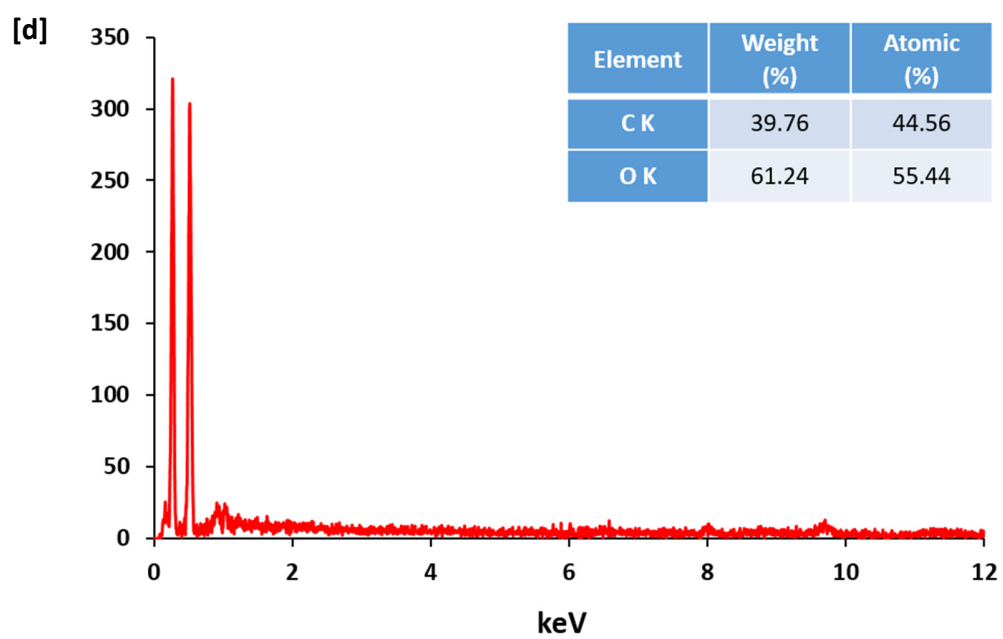

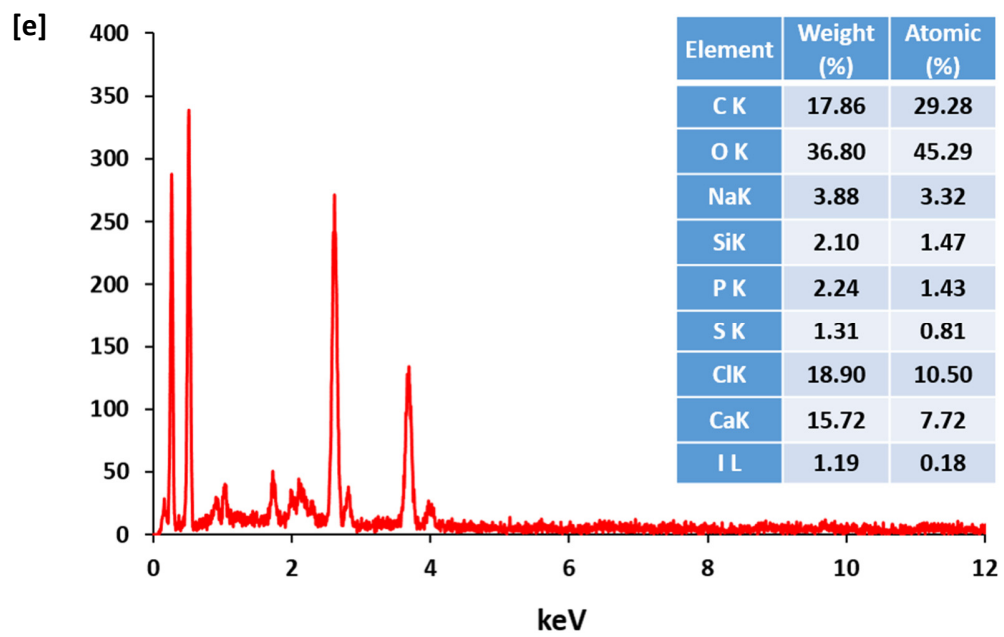

**Figure S2:** [a] Solution uptake in NaCl and [b] swelling ratio in NaCl.

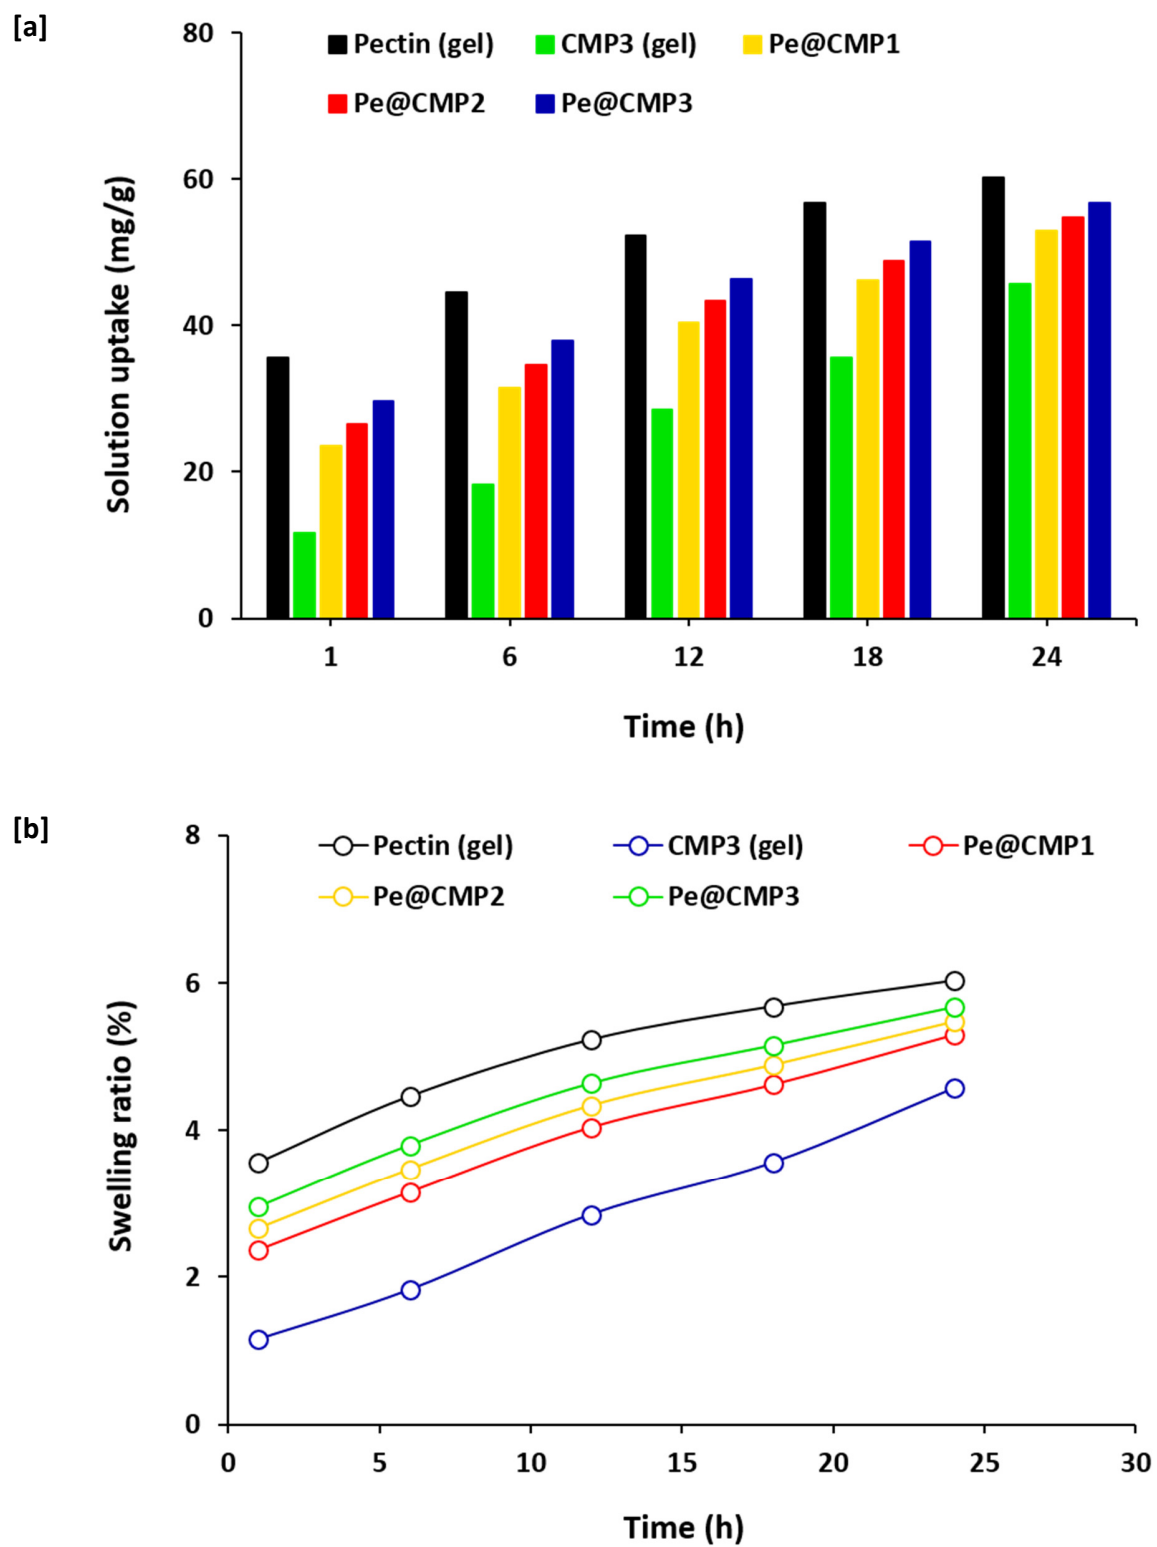

**Figure S3:** UV spectra for the PI; **[a]** pure PI (different concentrations) and **[b]** released PI from Pe@CMP hydrogel at different time.

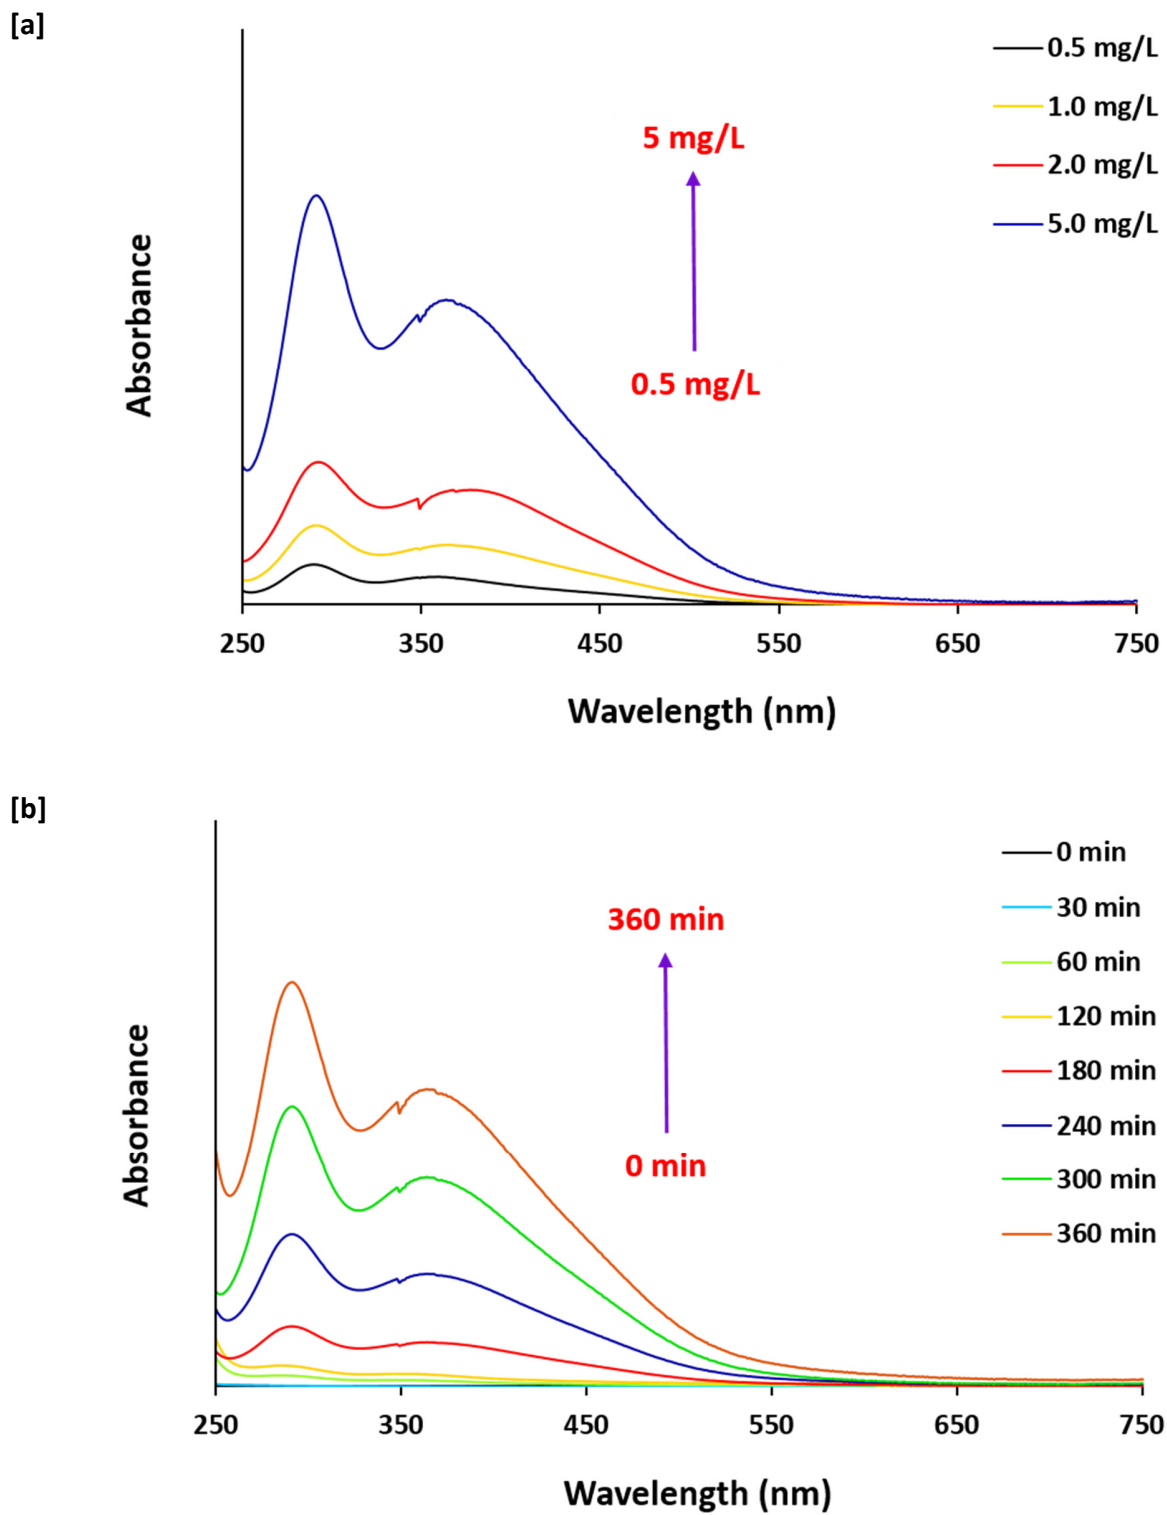

**Table S1:** Parameters of kinetics for the release of betadine from the Pe@CMP composites.

| Samples        | First Order    |                                      | Higuchi        |                                        | Hixson-Crowell |                                                            | Korsmeyer-Peppas |       |                                                          |
|----------------|----------------|--------------------------------------|----------------|----------------------------------------|----------------|------------------------------------------------------------|------------------|-------|----------------------------------------------------------|
|                | R <sup>2</sup> | K <sub>1</sub><br>(h <sup>-1</sup> ) | R <sup>2</sup> | K <sub>H</sub><br>(h <sup>-1/2</sup> ) | R <sup>2</sup> | K <sub>HC</sub> × 10 <sup>-3</sup><br>(h <sup>-1/3</sup> ) | R <sup>2</sup>   | n     | K <sub>KP</sub> × 10 <sup>-3</sup><br>(h <sup>-n</sup> ) |
| <b>CMP</b>     | 0.98           | 2.75                                 | 0.94           | 14.49                                  | 0.96           | 192.0                                                      | 0.98             | 0.069 | 300.0                                                    |
| <b>Pe@CMP1</b> | 0.95           | 1.69                                 | 0.90           | 9.19                                   | 0.87           | 78.0                                                       | 0.94             | 0.051 | 186.0                                                    |
| <b>Pe@CMP2</b> | 0.99           | 0.79                                 | 0.92           | 5.96                                   | 0.95           | 48.0                                                       | 0.99             | 0.049 | 84.0                                                     |
| <b>Pe@CMP3</b> | 0.90           | 1.37                                 | 0.88           | 7.62                                   | 0.75           | 54.0                                                       | 0.87             | 0.077 | 150.0                                                    |
